# Supplementary material for: SMYD5 regulates H4K20me3-marked heterochromatin to safeguard ES cell self-renewal and prevent spurious differentiation
Source: PubMed Central journal article supplement (PMC5324308; doi:10.1186/s13072-017-0115-7), 2017-02-23
Supplement: 13072_2017_115_MOESM1_ESM.pdf [file 13072_2017_115_MOESM1_ESM.pdf]

**A**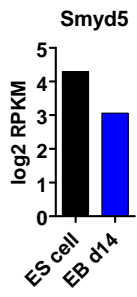**B**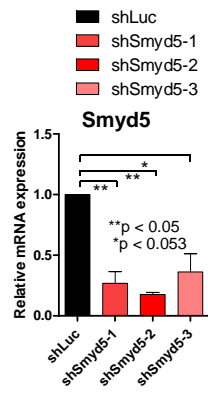**D**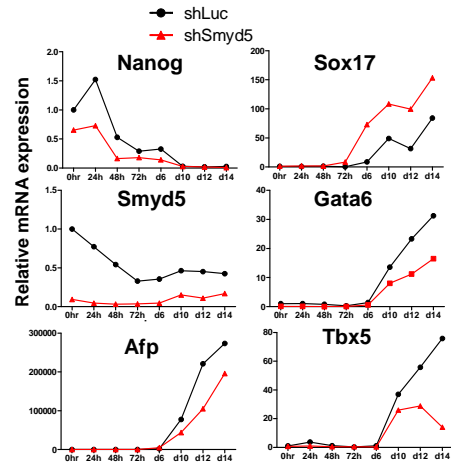**C**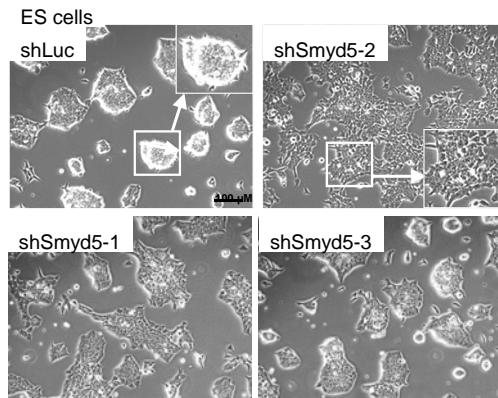**Figure S1**
