# Supplementary material for: SMYD5 regulates H4K20me3-marked heterochromatin to safeguard ES cell self-renewal and prevent spurious differentiation
Source: PubMed Central journal article supplement (PMC5324308; doi:10.1186/s13072-017-0115-7), 2017-02-23
Supplement: 13072_2017_115_MOESM6_ESM.pdf [file 13072_2017_115_MOESM6_ESM.pdf]

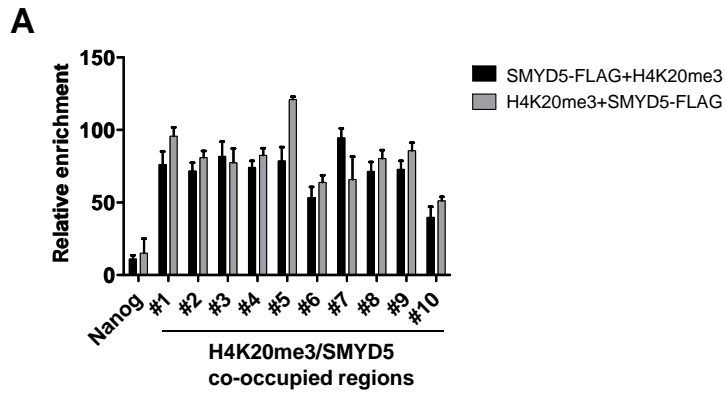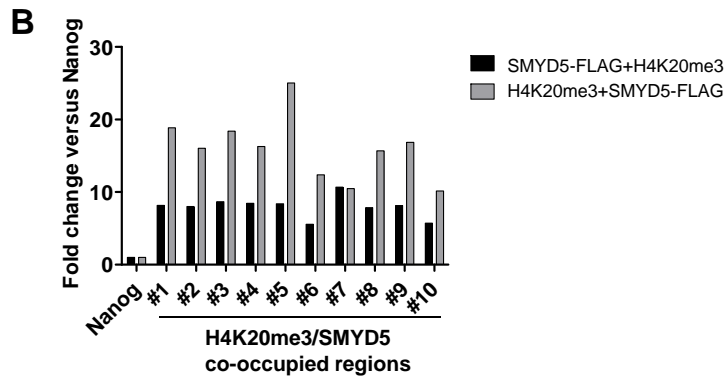

**C**

| H4K20me3/SMYD5 Region      | Annotation |
|----------------------------|------------|
| 1 chr5:80487201-80491599   | IAPeZ-int  |
| 2 chr17:83655401-83659799  | IAPeZ-int  |
| 3 chr16:89145401-89150199  | IAPeZ-int  |
| 4 chr9:78410601-78415799   | IAPeZ-int  |
| 5 chr18:21105001-21114999  | RLTR41     |
| 6 chrX:123079801-123084399 | IAPeZ-int  |
| 7 chr8:125949601-125958599 | MuLV-int   |
| 8 chrX:152213201-152217599 | IAPeZ-int  |
| 9 chr7:124480201-124484599 | IAPeZ-int  |

Figure S6
